# Supplementary material for: An annealing approach to form a nanotube from graphdiyne ribbon: a theoretical prediction
Source: Royal Society of Chemistry journal article supplement (doi:10.1039/d4cp03573a), 2024-01-01
Supplement: d4cp03573a1.pdf [file d4cp03573a1.pdf]

## Forming a graphdiyne nanotube from a nanoribbon through heat treatment in a protective gas: A molecular dynamics study

Bo Song<sup>1,2</sup>, Kun Cai<sup>3\*</sup>, Jiao Shi<sup>4</sup>, Qing-Hua Qin<sup>5\*</sup>

<sup>1</sup> School of Naval Architecture and Civil Engineering, Jiangsu University of Science and Technology, Zhangjiagang 215600, China

<sup>2</sup> Industrial Technology Research Institute, Jiangsu University of Science and Technology, Zhangjiagang 215600, China

<sup>3</sup> School of Science, Harbin Institute of Technology, Shenzhen 518055, China

<sup>4</sup> State Key Laboratory of Structural Analysis for Industrial Equipment, Dalian University of Technology, Dalian 116024, China.

<sup>5</sup> Institute of Advanced Interdisciplinary Technology, Shenzhen MSU-BIT University, Shenzhen 518172, China

\*Corresponding authors' email addresses: kun.cai@hit.edu.cn (K.C.); qinghua.qin@anu.edu.au (Q.H.Q.)

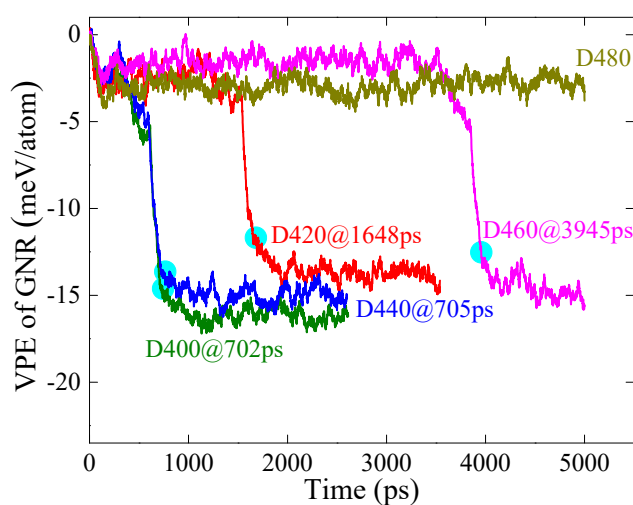

**Fig. A.1.** VPE per atom of the GNR self-scrolling on CNT (15, 15) in argon within D400 to D480 at 300 K vs the simulation time.

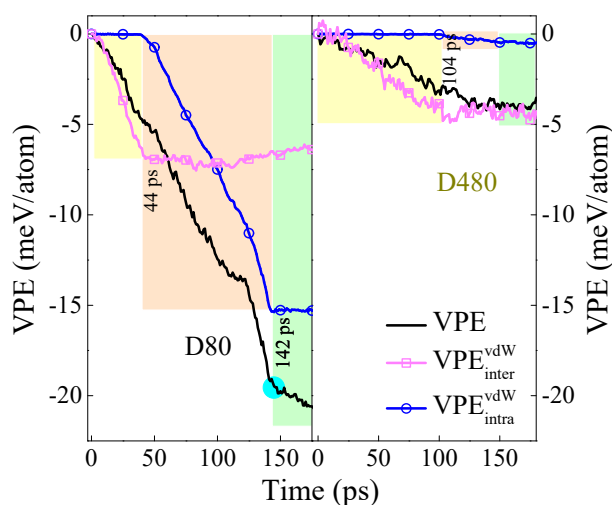

**Fig. A.2.** Detailed vdW interactions in the systems with gas densities of 80 kg/m<sup>3</sup> (denoted as D80) and 480 kg/m<sup>3</sup> (D480).

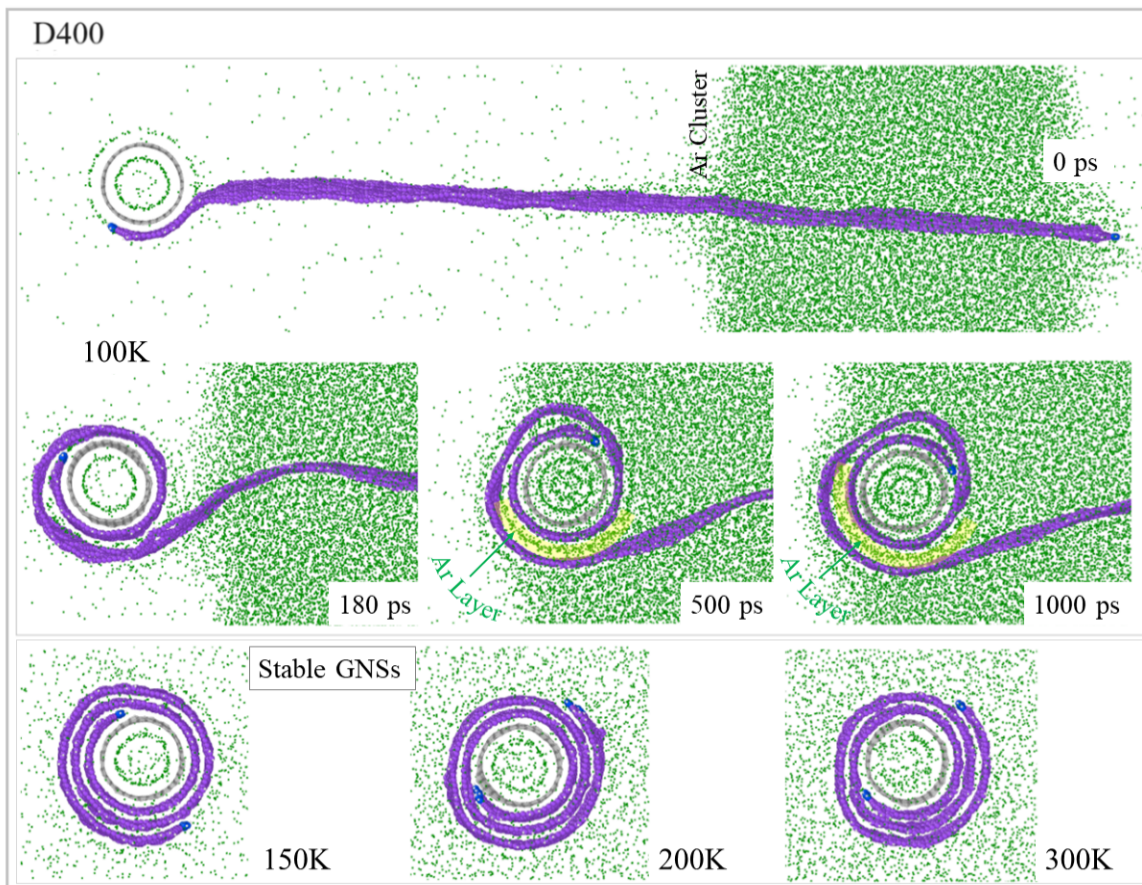

**Fig. A.3.** Representative snapshots and the final stable configurations of the self-scrolling system in different gas environments at temperatures between 10 K and 300 K with D400.

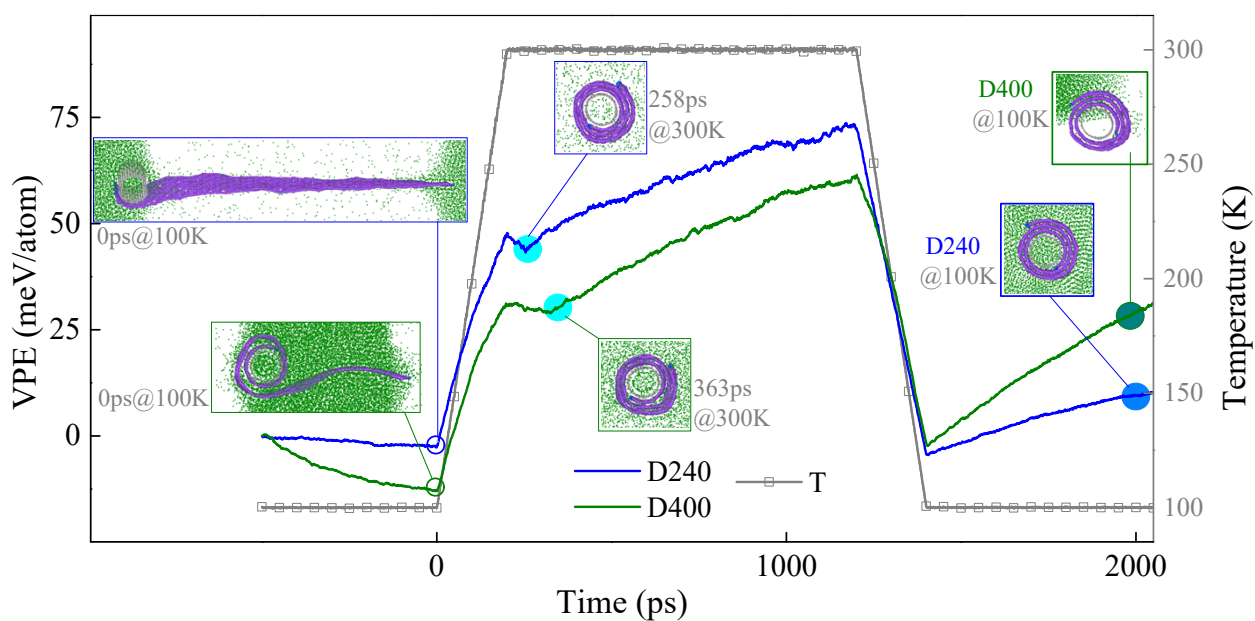

**Fig. A.4.** VPE per atom of the GNR as well as the system temperature as a function of the simulation time when the system is applied with an annealing treatment varies between 100 K to 300 K.

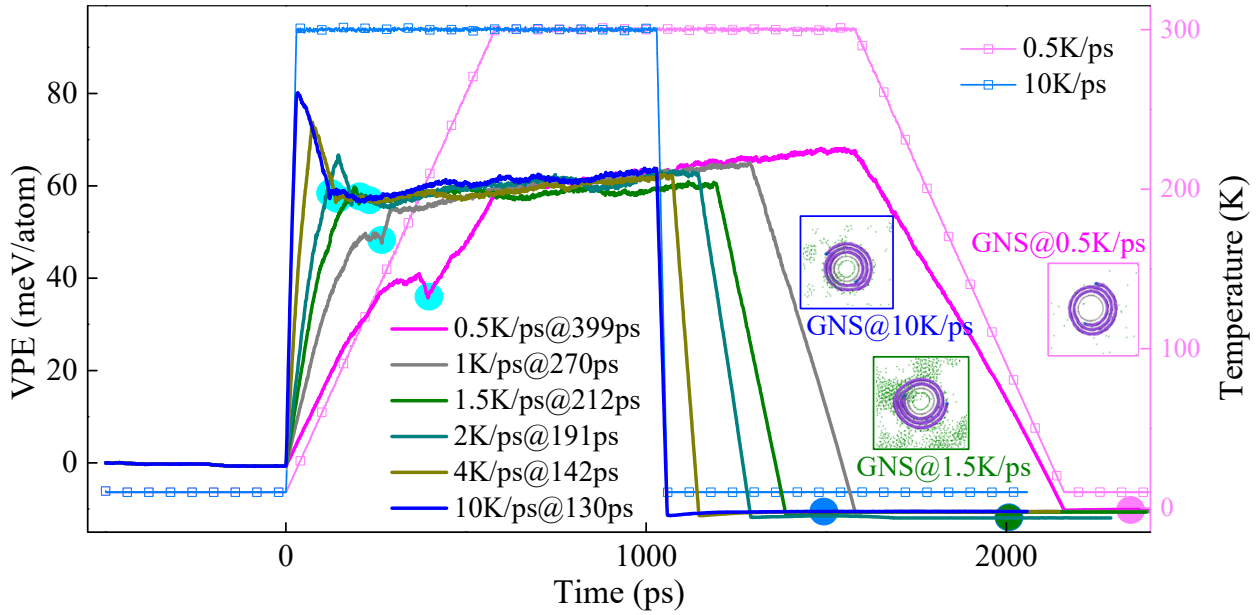

**Fig. A.5.** VPE per atom of the GNR as well as the system temperature as a function of the simulation time when the system is applied with annealing treatments with different heating/cooling rates varying from 0.5 to 10 K/ps. The temperature varies between 100 K to 300 K. The argon density is  $80 \text{ kg/m}^3$ .

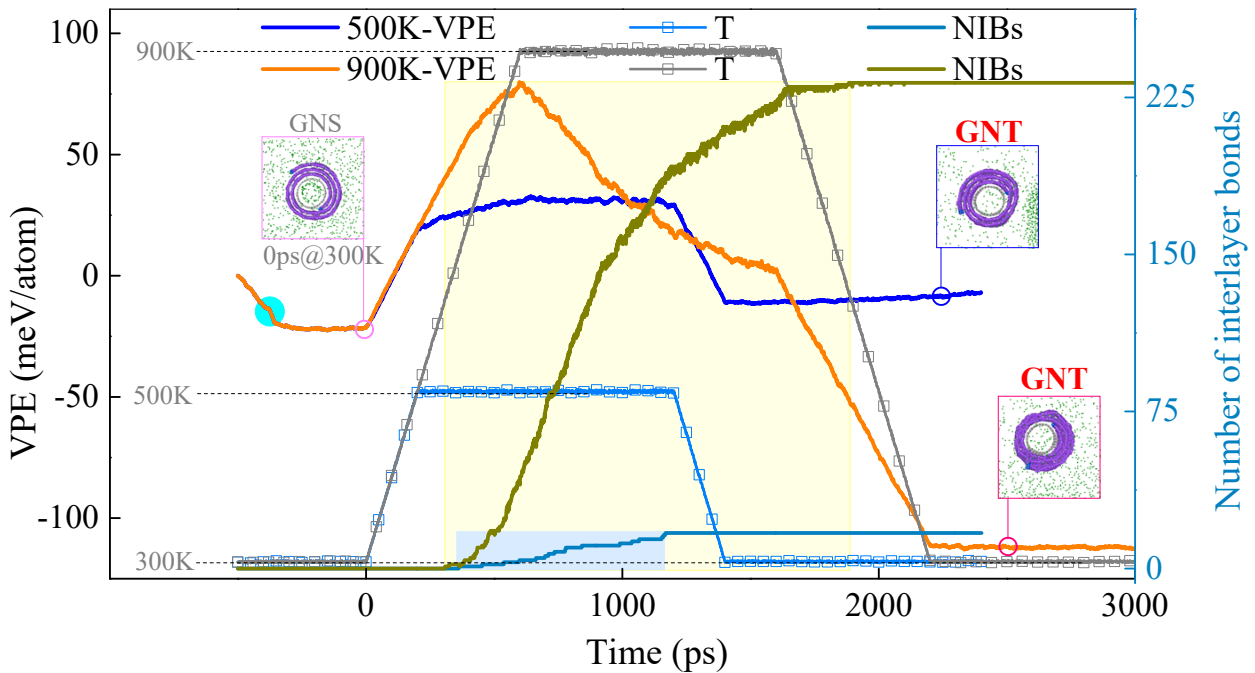

**Fig. A.6.** VPE per atom of the GNR and the NIBs inside the GNT as a function of the simulation time when the GNR self-scrolling on CNT in argon of D80 with annealing treatments. During the treatment, the heating and cooling rates are fixed at 1 K/ps.
